# Supplementary material
Source: PubMed Central journal article supplement (PMC7442658)
Supplement: NIHMS1602219-supplement-13524_2020_876_MOESM1_ESM.pdf [file NIHMS1602219-supplement-13524_2020_876_MOESM1_ESM.pdf]

# Online Appendix

## Section A

**Table A1**  
**Departure of Birthweight for Children In Utero During 9/11 Attack**  
**Using Natality Data on Births Conceived before August 14, 2001**  
**Excluding Residents of New York City and the Washington D.C. Metropolitan Area<sup>1</sup>**  
**Using Various Alternative Methods to Control for Temporal Variation**

| Birthweight               | Observations | Mean  | Month of Conception         |                             |                             |                             |                             |                             |                             |                             |
|---------------------------|--------------|-------|-----------------------------|-----------------------------|-----------------------------|-----------------------------|-----------------------------|-----------------------------|-----------------------------|-----------------------------|
|                           |              |       | Jan 2001                    | Feb 2001                    | Mar 2001                    | Apr 2001                    | May 2001                    | June 2001                   | July 2001                   | Aug 2001 <sup>2</sup>       |
| Main Analysis             | 27,552,002   | 3,323 | -1.48<br>(1.21)             | <b>-5.60</b> ***<br>(1.21)  | <b>-9.70</b> ***<br>(1.21)  | <b>-7.66</b> ***<br>(1.23)  | <b>-10.07</b> ***<br>(1.21) | <b>-6.61</b> ***<br>(1.19)  | <b>-8.40</b> ***<br>(1.19)  | <b>-15.29</b> ***<br>(1.72) |
| Spline - 6 Periods        | 27,552,002   | 3,323 | 1.10<br>(1.48)              | -2.19<br>(1.64)             | <b>-8.77</b> ***<br>(1.83)  | <b>-10.98</b> ***<br>(2.03) | -6.44***<br>(2.23)          | -8.53***<br>(2.43)          | -6.54***<br>(2.65)          | <b>-14.35</b> ***<br>(3.12) |
| Spline - 10 Periods       | 27,552,002   | 3,323 | -2.06<br>(2.39)             | -7.37**<br>(3.42)           | -7.17<br>(4.51)             | -6.50<br>(5.63)             | -9.99<br>(6.75)             | -10.52<br>(7.87)            | -16.21<br>(9.01)            | -27.17***<br>(10.22)        |
| Quadratic Trends          | 27,552,002   | 3,323 | <b>-10.00</b> ***<br>(1.18) | <b>-14.09</b> ***<br>(1.18) | <b>-17.95</b> ***<br>(1.17) | <b>-15.81</b> ***<br>(1.19) | <b>-15.71</b> ***<br>(1.17) | <b>-12.28</b> ***<br>(1.15) | <b>-14.07</b> ***<br>(1.15) | <b>-20.96</b> ***<br>(1.70) |
| 10-month FEs <sup>3</sup> | 27,552,002   | 3,323 | <b>-2.23</b><br>(1.32)      | <b>-6.40</b> ***<br>(1.32)  | <b>-10.69</b> ***<br>(1.32) | <b>-8.77</b> ***<br>(1.34)  | <b>-8.61</b> ***<br>(1.32)  | <b>-5.14</b> ***<br>(1.30)  | <b>-6.92</b> ***<br>(1.30)  | <b>-13.95</b> ***<br>(1.80) |

**Notes:**

Data obtained from National Center of Health Statistics 1995 to 2002 birth certificates.

Robust standard errors are in parenthesis with, \*\*, meaning significant at 5 percent, \*\*\*, meaning significant at 1 percent, and **BOX** meaning significant using the Schwarz Criteria.

Each regression controls for temporal trends as indicated in the relevant column header, conception week fixed effects, mother's state of residence fixed effects, fixed effects for live birth order (8-levels), fixed effects for mother's age (36-levels), fixed effects for mother's education level (18-levels), plurality, mother's diabetes, mother's race (white, black, Hispanic, and other), child's gender.

<sup>1</sup>The Washington D.C. metropolitan area is defined as the Washington, DC-MD-VA-WV Primary Metropolitan Statistical Area (PMSA)

<sup>2</sup>Conceived between August 1, 2001 and August 14, 2001.

<sup>3</sup>Oldest conception cohort fixed effect group is only made up of 2 conception months, as the data does not split evenly by groups of 10 conception months.

**Table A2**  
**Departure of Birth Outcomes for Children In Utero During 9/11 Attack**  
**Using Natality Data on Births Conceived before August 14, 2001**  
**Excluding Residents of the New York City and Washington D.C. Metropolitan Areas<sup>1</sup>**

| Birth Outcome     | Observations | Mean  | Month of Conception |                            |                            |                            |                             |                            |                            |                             |
|-------------------|--------------|-------|---------------------|----------------------------|----------------------------|----------------------------|-----------------------------|----------------------------|----------------------------|-----------------------------|
|                   |              |       | Jan 2001            | Feb 2001                   | Mar 2001                   | Apr 2001                   | May 2001                    | June 2001                  | July 2001                  | Aug 2001 <sup>2</sup>       |
| Birthweight       | 27,415,768   | 3,323 | -1.49<br>(1.22)     | <b>-5.61</b> ***<br>(1.21) | <b>-9.87</b> ***<br>(1.21) | <b>-7.64</b> ***<br>(1.23) | <b>-10.11</b> ***<br>(1.21) | <b>-6.70</b> ***<br>(1.20) | <b>-8.51</b> ***<br>(1.19) | <b>-15.29</b> ***<br>(1.73) |
| BW for GA Z-Score | 27,415,768   | 0.00  | -0.005**<br>(0.002) | -0.001<br>(0.002)          | 0.003<br>(0.002)           | 0.000<br>(0.002)           | -0.008***<br>(0.002)        | -0.010***<br>(0.002)       | -0.011***<br>(0.002)       | -0.015***<br>(0.003)        |
| LBW (<2,500 g)    | 27,415,768   | 7.4%  | 0.09%<br>(0.05)     | 0.13%**<br>(0.05)          | <b>0.26%</b> ***<br>(0.05) | <b>0.38%</b> ***<br>(0.06) | <b>0.28%</b> ***<br>(0.05)  | 0.16%***<br>(0.05)         | 0.19%***<br>(0.05)         | 0.22%***<br>(0.08)          |
| VLBW (<1,500 g)   | 27,415,768   | 1.3%  | 0.04%<br>(0.03)     | 0.00%<br>(0.03)            | 0.09%***<br>(0.03)         | 0.16%***<br>(0.03)         | 0.19%***<br>(0.03)          | 0.09%***<br>(0.02)         | 0.07%***<br>(0.02)         | -0.02%<br>(0.04)            |
| Preterm (<37 wks) | 27,431,784   | 11.3% | -0.08%<br>(0.07)    | <b>0.51%</b> ***<br>(0.07) | <b>0.98%</b> ***<br>(0.07) | <b>0.66%</b> ***<br>(0.07) | <b>0.35%</b> ***<br>(0.07)  | 0.03%<br>(0.07)            | 0.16%**<br>(0.07)          | <b>-0.49%</b> ***<br>(0.08) |
| Male              | 27,431,784   | 51.2% | 0.10%<br>(0.11)     | -0.11%<br>(0.11)           | 0.15%<br>(0.11)            | 0.05%<br>(0.11)            | 0.04%<br>(0.11)             | -0.05%<br>(0.11)           | -0.03%<br>(0.11)           | 0.07%<br>(0.15)             |

**Notes:**

Data obtained from National Center of Health Statistics 1995 to 2002 birth certificates.

Robust standard errors are in parenthesis with, \*\*, meaning significant at 5 percent, \*\*\*, meaning significant at 1 percent, and **BOX** meaning significant using the Schwarz Criteria.

Each regression controls for 16 month conception cohort fixed effects, conception week fixed effects, mother's state of residence fixed effects, fixed effects for live birth order (8-levels), fixed effects for mother's age (36-levels), fixed effects for mother's education level (18-levels), plurality, mother's diabetes, mother's race (white, black, Hispanic, and other), child's gender, and an interaction of the conception cohort and mother's state of residence fixed effects.

<sup>1</sup>The New York City and Washington D.C. metropolitan areas are defined as the New York, NY Primary Metropolitan Statistical Area and the Washington, DC-MD-VA-WV Primary Metropolitan Statistical Area (PMSA), respectively.

<sup>2</sup>Concieved between August 1, 2001 and August 14, 2001.

**Table A3**  
**Departure of Birth Outcomes for Children In Utero During 9/11 Attack**  
**Using Natality Data on Births Conceived before August 14, 2001**  
**Excluding Residents of New York City and the Washington D.C. Metropolitan Area<sup>1</sup>**

| Birth Outcome     | Observations | Mean  | Month of Conception |                            |                            |                            |                            |                            |                            |                             |
|-------------------|--------------|-------|---------------------|----------------------------|----------------------------|----------------------------|----------------------------|----------------------------|----------------------------|-----------------------------|
|                   |              |       | Jan 2001            | Feb 2001                   | Mar 2001                   | Apr 2001                   | May 2001                   | June 2001                  | July 2001                  | Aug 2001 <sup>2</sup>       |
| Birthweight       | 780,888      | 3,259 | -1.09<br>(1.39)     | <b>-5.24</b> ***<br>(1.38) | <b>-9.23</b> ***<br>(1.43) | <b>-7.13</b> ***<br>(1.44) | <b>-9.41</b> ***<br>(1.43) | <b>-6.36</b> ***<br>(1.42) | <b>-7.99</b> ***<br>(1.36) | <b>-14.73</b> ***<br>(2.06) |
| BW for GA Z-Score | 780,888      | -0.04 | -0.004<br>(0.002)   | -0.001<br>(0.002)          | 0.004<br>(0.002)           | 0.001<br>(0.002)           | -0.007***<br>(0.002)       | -0.009***<br>(0.002)       | -0.011***<br>(0.002)       | -0.015***<br>(0.003)        |
| LBW (<2,500 g)    | 780,888      | 9.9%  | 0.07%<br>(0.06)     | 0.11%*<br>(0.06)           | <b>0.25%</b> ***<br>(0.06) | <b>0.37%</b> ***<br>(0.06) | <b>0.25%</b> ***<br>(0.06) | 0.15%***<br>(0.06)         | 0.18%***<br>(0.06)         | 0.21%**<br>(0.09)           |
| VLBW (<1,500 g)   | 780,888      | 2.6%  | 0.03%<br>(0.03)     | -0.01%<br>(0.03)           | 0.08%***<br>(0.03)         | <b>0.15%</b> ***<br>(0.03) | <b>0.18%</b> ***<br>(0.03) | 0.09%***<br>(0.03)         | 0.06%**<br>(0.03)          | -0.03%<br>(0.04)            |
| Preterm (<37 wks) | 781,490      | 13.5% | -0.09%<br>(0.08)    | <b>0.50%</b> ***<br>(0.08) | <b>0.97%</b> ***<br>(0.09) | <b>0.65%</b> ***<br>(0.09) | <b>0.33%</b> ***<br>(0.08) | 0.03%<br>(0.08)            | 0.15%<br>(0.08)            | <b>-0.49%</b> ***<br>(0.09) |
| Male              | 781,490      | 50.4% | 0.14%<br>(1.71)     | -0.04%<br>(1.71)           | 0.19%<br>(1.70)            | 0.09%<br>(1.69)            | 0.03%<br>(1.68)            | -0.05%<br>(1.67)           | -0.03%<br>(1.67)           | 0.13%<br>(2.22)             |

**Notes:**

Data obtained from National Center of Health Statistics 1995 to 2002 birth certificates. Data was collapsed such that each cell contains all the individuals from the same county of residence, week of gestation, year of conception, and sex. The regressions are weighted by the number of individuals that are contained in each cell.

Robust standard errors are in parenthesis with, \*\*, meaning significant at 5 percent, \*\*\*, meaning significant at 1 percent, and **BOX** meaning significant using the Schwarz Criteria.

Each regression controls for 16 month conception cohort fixed effects, conception week fixed effects, mother's state of residence fixed effects, fixed effects for live birth order (8-levels), fixed effects for mother's age (36-levels), fixed effects for mother's education level (18-levels), plurality, mother's diabetes, mother's race (white, black, Hispanic, and other), child's gender, and an interaction of the conception cohort and mother's state of residence fixed effects.

\*\* Significant at 5 percent, \*\*\* Significant at 1 percent, **BOX** Significant using the Schwarz Criteria

<sup>1</sup>The Washington D.C. metropolitan area is defined as the Washington, DC-MD-VA-WV Primary Metropolitan Statistical Area (PMSA)

<sup>2</sup>Concieved between August 1, 2001 and August 14, 2001.

**Table A4**  
**Departure of Birth Outcomes for Children In Utero During 9/11 Attack**  
**Using Collapsed Natality Data on Births Conceived before August 14, 2001**  
**Excluding Residents of New York City and the Washington D.C. Metropolitan Area<sup>1</sup>**  
**and Controlling for County Level Economic Conditions**

| Birth Outcome     | Observations | Mean  | Month of Conception |                            |                             |                            |                             |                            |                             |                             |  |  |
|-------------------|--------------|-------|---------------------|----------------------------|-----------------------------|----------------------------|-----------------------------|----------------------------|-----------------------------|-----------------------------|--|--|
|                   |              |       | Jan 2001            | Feb 2001                   | Mar 2001                    | Apr 2001                   | May 2001                    | June 2001                  | July 2001                   | Aug 2001 <sup>2</sup>       |  |  |
| Birthweight       | 780,888      | 3,259 | -0.18<br>(1.41)     | <b>-5.86</b> ***<br>(1.39) | <b>-10.21</b> ***<br>(1.45) | <b>-7.69</b> ***<br>(1.45) | <b>-10.82</b> ***<br>(1.45) | <b>-7.71</b> ***<br>(1.46) | <b>-11.21</b> ***<br>(1.40) | <b>-17.23</b> ***<br>(2.09) |  |  |
| BW for GA Z-Score | 780,888      | -0.04 | 0.00**<br>(0.00)    | -0.002<br>(0.002)          | 0.002<br>(0.002)            | -0.002<br>(0.002)          | -0.009***<br>(0.002)        | -0.012***<br>(0.002)       | -0.014***<br>(0.002)        | -0.018***<br>(0.003)        |  |  |
| LBW (<2,500 g)    | 780,888      | 9.9%  | 0.04%<br>(0.06)     | 0.12%**<br>(0.06)          | <b>0.26%</b> ***<br>(0.06)  | <b>0.36%</b> ***<br>(0.06) | <b>0.27%</b> ***<br>(0.06)  | 0.18%***<br>(0.06)         | <b>0.26%</b> ***<br>(0.06)  | <b>0.27%</b> ***<br>(0.09)  |  |  |
| VLBW (<1,500 g)   | 780,888      | 2.6%  | 0.02%<br>(0.03)     | -0.01%<br>(0.03)           | 0.07%**<br>(0.03)           | <b>0.15%</b> ***<br>(0.03) | <b>0.18%</b> ***<br>(0.03)  | 0.09%***<br>(0.03)         | 0.08%***<br>(0.03)          | -0.02%<br>(0.04)            |  |  |
| Preterm (<37 wks) | 781,490      | 13.5% | -0.16%<br>(0.08)    | <b>0.50%</b> ***<br>(0.08) | <b>0.99%</b> ***<br>(0.09)  | <b>0.61%</b> ***<br>(0.09) | <b>0.35%</b> ***<br>(0.08)  | 0.06%<br>(0.08)            | 0.27%***<br>(0.08)          | <b>-0.42%</b> ***<br>(0.10) |  |  |
| Male              | 781,490      | 50.4% | 0.12%<br>(1.73)     | -0.05%<br>(1.73)           | 0.17%<br>(1.72)             | 0.09%<br>(1.70)            | 0.00%<br>(1.70)             | -0.06%<br>(1.70)           | -0.06%<br>(1.70)            | 0.11%<br>(2.25)             |  |  |

**Notes:**

Data obtained from National Center of Health Statistics 1995 to 2002 birth certificates. Data was collapsed such that each cell contains all the individuals from the same county of residence, week of gestation, year of conception, and sex. The regressions are weighted by the number of individuals that are contained in each cell.

Robust standard errors are in parenthesis with, \*\*, meaning significant at 5 percent, \*\*\*, meaning significant at 1 percent, and **BOX** meaning significant using the Schwarz Criteria.

Each regression controls for 16 month conception cohort fixed effects, conception week fixed effects, mother's state of residence fixed effects, fixed effects for live birth order (8-levels), fixed effects for mother's age (36-levels), fixed effects for mother's education level (18-levels), plurality, mother's diabetes, mother's race (white, black, Hispanic, and other), child's gender, and an interaction of the conception cohort and mother's state of residence fixed effects. Additionally, these regressions contain controls for the unemployment level in the child's county of residence during the 15 months following the estimated conception month, calculated from the Bureau of Labor Statistics, Local Area Unemployment Statistics.

<sup>1</sup>The Washington D.C. metropolitan area is defined as the Washington, DC-MD-VA-WV Primary Metropolitan Statistical Area (PMSA)

<sup>2</sup>Concieved between August 1, 2001 and August 14, 2001.

**Table A5**  
**Departure of Birth Outcomes for Children In Utero During 9/11 Attack**  
**Using Collapsed Natality Data on Births Conceived before August 14, 2001**  
**Excluding Residents of New York City and the Washington D.C. Metropolitan Area<sup>1</sup>**  
**and Including County Level Fixed Effects**

| Birth Outcome     | Observations | Mean  | Month of Conception  |                            |                            |                            |                            |                            |                            |                             |
|-------------------|--------------|-------|----------------------|----------------------------|----------------------------|----------------------------|----------------------------|----------------------------|----------------------------|-----------------------------|
|                   |              |       | Jan 2001             | Feb 2001                   | Mar 2001                   | Apr 2001                   | May 2001                   | June 2001                  | July 2001                  | Aug 2001 <sup>2</sup>       |
| Birthweight       | 780,888      | 3,259 | -1.18<br>(1.33)      | <b>-5.29</b> ***<br>(1.30) | <b>-9.22</b> ***<br>(1.36) | <b>-7.17</b> ***<br>(1.36) | <b>-9.37</b> ***<br>(1.36) | <b>-6.30</b> ***<br>(1.35) | <b>-7.84</b> ***<br>(1.31) | <b>-14.53</b> ***<br>(1.98) |
| BW for GA Z-Score | 780,888      | -0.04 | -0.005 **<br>(0.002) | -0.001<br>(0.002)          | 0.004<br>(0.002)           | 0.000<br>(0.002)           | -0.007 ***<br>(0.002)      | -0.009 ***<br>(0.002)      | -0.011 ***<br>(0.002)      | -0.015 ***<br>(0.003)       |
| LBW (<2,500 g)    | 780,888      | 9.9%  | 0.07%<br>(0.06)      | 0.11% **<br>(0.06)         | <b>0.24%</b> ***<br>(0.06) | <b>0.36%</b> ***<br>(0.06) | <b>0.24%</b> ***<br>(0.06) | 0.15% ***<br>(0.06)        | 0.17% ***<br>(0.06)        | 0.20% **<br>(0.09)          |
| VLBW (<1,500 g)   | 780,888      | 2.6%  | 0.03%<br>(0.03)      | -0.01%<br>(0.03)           | 0.07% ***<br>(0.03)        | <b>0.15%</b> ***<br>(0.03) | <b>0.18%</b> ***<br>(0.03) | 0.09% ***<br>(0.03)        | 0.06% **<br>(0.03)         | -0.03%<br>(0.04)            |
| Preterm (<37 wks) | 781,490      | 13.5% | -0.09%<br>(0.08)     | <b>0.50%</b> ***<br>(0.08) | <b>0.97%</b> ***<br>(0.09) | <b>0.65%</b> ***<br>(0.09) | <b>0.31%</b> ***<br>(0.08) | 0.02%<br>(0.08)            | 0.13%<br>(0.08)            | <b>-0.51%</b> ***<br>(0.10) |
| Male              | 781,490      | 50.4% | 0.15%<br>(1.71)      | -0.04%<br>(1.72)           | 0.22%<br>(1.70)            | 0.09%<br>(1.69)            | 0.07%<br>(1.68)            | -0.04%<br>(1.68)           | 0.00%<br>(1.67)            | 0.18%<br>(2.22)             |

**Notes:**

Data obtained from National Center of Health Statistics 1995 to 2002 birth certificates. Data was collapsed such that each cell contains all the individuals from the same county of residence, week of gestation, year of conception, and sex. The regressions are weighted by the number of individuals that are contained in each cell.

Robust standard errors are in parenthesis with, \*\*, meaning significant at 5 percent, \*\*\*, meaning significant at 1 percent, and **BOX** meaning significant using the Schwarz Criteria.

Each regression controls for 16 month conception cohort fixed effects, conception week fixed effects, mother's county of residence fixed effects, fixed effects for live birth order (8-levels), fixed effects for mother's age (36-levels), fixed effects for mother's education level (18-levels), plurality, mother's diabetes, mother's race (white, black, Hispanic, and other), child's gender, and an interaction of the conception cohort and mother's county of residence fixed effects.

<sup>1</sup>The Washington D.C. metropolitan area is defined as the Washington, DC-MD-VA-WV Primary Metropolitan Statistical Area (PMSA)

<sup>2</sup>Concieved between August 1, 2001 and August 14, 2001.

## Section B

**Table B1**  
**Departure of Birth Outcomes for Children In Utero During 9/11 Attack**  
**Using Natality Data on Births from January 1, 1995 to May 31, 2002**  
**Excluding Residents of New York City and the Washington D.C. Metropolitan Area<sup>1</sup>**

| Birth Outcome     | Observations | Mean  | Month of Birth    |                  |                                   |                  |                   |                                   |                      |                                     |
|-------------------|--------------|-------|-------------------|------------------|-----------------------------------|------------------|-------------------|-----------------------------------|----------------------|-------------------------------------|
|                   |              |       | Oct 2001          | Nov 2001         | Dec 2001                          | Jan 2002         | Feb 2002          | Mar 2002                          | Apr 2002             | May 2002                            |
| Birthweight       | 27,830,257   | 3,320 | -0.05<br>(1.49)   | 0.33<br>(1.52)   | -4.19 ***<br>(1.51)               | 2.57<br>(1.50)   | -0.37<br>(1.53)   | <b>-7.91 ***</b><br><b>(1.50)</b> | -3.32 **<br>(1.51)   | <b>-8.31 ***</b><br><b>(1.50)</b>   |
| BW for GA Z-Score | 27,549,946   | 0.00  | -0.004<br>(0.003) | 0.001<br>(0.003) | 0.000<br>(0.003)                  | 0.005<br>(0.003) | -0.002<br>(0.003) | -0.009 ***<br>(0.003)             | -0.005 **<br>(0.003) | <b>-0.014 ***</b><br><b>(0.003)</b> |
| LBW (<2,500 g)    | 27,830,257   | 7.5%  | 0.00%<br>(0.07)   | 0.00%<br>(0.07)  | 0.08%<br>(0.07)                   | -0.04%<br>(0.07) | 0.02%<br>(0.07)   | 0.21% ***<br>(0.07)               | 0.05%<br>(0.07)      | 0.19% ***<br>(0.07)                 |
| VLBW (<1,500 g)   | 27,830,257   | 1.4%  | 0.01%<br>(0.03)   | 0.04%<br>(0.03)  | 0.05%<br>(0.03)                   | 0.05%<br>(0.03)  | 0.01%<br>(0.03)   | 0.09% ***<br>(0.03)               | 0.05%<br>(0.03)      | 0.07% **<br>(0.03)                  |
| Preterm (<37 wks) | 27,566,306   | 11.5% | -0.02%<br>(0.08)  | 0.11%<br>(0.08)  | <b>0.38% ***</b><br><b>(0.08)</b> | 0.06%<br>(0.08)  | 0.04%<br>(0.08)   | 0.20% **<br>(0.08)                | 0.07%<br>(0.08)      | 0.11%<br>(0.08)                     |
| Male              | 27,861,010   | 51.2% | -0.02%<br>(0.13)  | -0.04%<br>(0.14) | -0.25%<br>(0.14)                  | 0.06%<br>(0.13)  | -0.08%<br>(0.14)  | -0.13%<br>(0.13)                  | -0.11%<br>(0.14)     | -0.10%<br>(0.13)                    |

**Notes:**

Data obtained from National Center of Health Statistics 1995 to 2002 birth certificates.

Robust standard errors are in parenthesis with, \*\*, meaning significant at 5 percent, \*\*\*, meaning significant at 1 percent, and **BOX** meaning significant using the Schwarz Criteria.

Each regression controls for 16 month birth cohort fixed effects, birth month fixed effects, mother's state of residence fixed effects, fixed effects for live birth order (8-levels), fixed effects for mother's age (36-levels), fixed effects for mother's education level (18-levels), plurality, mother's diabetes, mother's race (white, black, Hispanic, and other), child's gender, and an interaction of the birth cohort and mother's state of residence fixed effects.

<sup>1</sup>The Washington D.C. metropolitan area is defined as the Washington, DC-MD-VA-WV Primary Metropolitan Statistical Area (PMSA)

**Table B2**  
**Departure of Birth Outcomes for Children In Utero During 9/11 Attack**  
**Using Natality Data on Births from January 1, 1995 to May 31, 2002**  
**Excluding Residents of the New York City and Washington D.C. Metropolitan Areas<sup>1</sup>**

| Birth Outcome     | Observations | Mean  | Month of Birth    |                  |                            |                  |                   |                            |                      |                              |
|-------------------|--------------|-------|-------------------|------------------|----------------------------|------------------|-------------------|----------------------------|----------------------|------------------------------|
|                   |              |       | Oct 2001          | Nov 2001         | Dec 2001                   | Jan 2002         | Feb 2002          | Mar 2002                   | Apr 2002             | May 2002                     |
| Birthweight       | 27,693,676   | 3,320 | 0.15<br>(1.50)    | 0.41<br>(1.52)   | -4.17 ***<br>(1.51)        | 2.54<br>(1.51)   | -0.33<br>(1.53)   | <b>-7.85 ***</b><br>(1.50) | -3.18 **<br>(1.52)   | <b>-8.22 ***</b><br>(1.50)   |
| BW for GA Z-Score | 27,413,705   | 0.00  | -0.003<br>(0.003) | 0.000<br>(0.003) | 0.000<br>(0.003)           | 0.005<br>(0.003) | -0.002<br>(0.003) | -0.010 ***<br>(0.003)      | -0.005 **<br>(0.003) | <b>-0.014 ***</b><br>(0.003) |
| LBW (<2,500 g)    | 27,693,676   | 7.5%  | -0.01%<br>(0.07)  | -0.01%<br>(0.07) | 0.07%<br>(0.07)            | -0.05%<br>(0.07) | 0.02%<br>(0.07)   | 0.20% ***<br>(0.07)        | 0.04%<br>(0.07)      | 0.18% ***<br>(0.07)          |
| VLBW (<1,500 g)   | 27,693,676   | 1.4%  | 0.01%<br>(0.03)   | 0.03%<br>(0.03)  | 0.05%<br>(0.03)            | 0.05%<br>(0.03)  | 0.00%<br>(0.03)   | 0.08% ***<br>(0.03)        | 0.04%<br>(0.03)      | 0.06% **<br>(0.03)           |
| Preterm (<37 wks) | 27,430,025   | 11.5% | -0.02%<br>(0.08)  | 0.10%<br>(0.08)  | <b>0.38% ***</b><br>(0.08) | 0.05%<br>(0.08)  | 0.04%<br>(0.08)   | 0.20% **<br>(0.08)         | 0.06%<br>(0.08)      | 0.10%<br>(0.08)              |
| Male              | 27,724,382   | 51.2% | 0.00%<br>(0.13)   | -0.02%<br>(0.14) | -0.24%<br>(0.14)           | 0.06%<br>(0.13)  | -0.07%<br>(0.14)  | -0.11%<br>(0.13)           | -0.10%<br>(0.14)     | -0.09%<br>(0.13)             |

**Notes:**

Data obtained from National Center of Health Statistics 1995 to 2002 birth certificates.

Robust standard errors are in parenthesis with, \*\*, meaning significant at 5 percent, \*\*\*, meaning significant at 1 percent, and **BOX** meaning significant using the Schwarz Criteria.

Each regression controls for 16 month birth cohort fixed effects, birth month fixed effects, mother's state of residence fixed effects, fixed effects for live birth order (8-levels), fixed effects for mother's age (36-levels), fixed effects for mother's education level (18-levels), plurality, mother's diabetes, mother's race (white, black, Hispanic, and other), child's gender, and an interaction of the birth cohort and mother's state of residence fixed effects.

<sup>1</sup>The New York City and Washington D.C. metropolitan areas are defined as the New York, NY Primary Metropolitan Statistical Area and the Washington, DC-MD-VA-WV Primary Metropolitan Statistical Area (PMSA), respectively.

**Table B3**  
**Departure of Birth Outcomes for Children In Utero During 9/11 Attack**  
**Using Collapsed Natality Data on Births from January 1, 1995 to May 31, 2002**  
**Excluding Residents of New York City and the Washington D.C. Metropolitan Area<sup>1</sup>**

| Birth Outcome     | Observations | Mean  | Month of Birth    |                  |                           |                  |                   |                             |                   |                             |
|-------------------|--------------|-------|-------------------|------------------|---------------------------|------------------|-------------------|-----------------------------|-------------------|-----------------------------|
|                   |              |       | Oct 2001          | Nov 2001         | Dec 2001                  | Jan 2002         | Feb 2002          | Mar 2002                    | Apr 2002          | May 2002                    |
| Birthweight       | 329,011      | 3,218 | -0.03<br>(2.03)   | 0.76<br>(1.93)   | -3.72<br>(1.94)           | 2.89<br>(1.92)   | 0.05<br>(1.94)    | <b>-7.31***</b><br>(1.92)   | -2.68<br>(1.96)   | <b>-7.97***</b><br>(1.89)   |
| BW for GA Z-Score | 280,177      | -0.06 | -0.004<br>(0.003) | 0.001<br>(0.003) | 0.000<br>(0.003)          | 0.005<br>(0.003) | -0.002<br>(0.003) | <b>-0.009***</b><br>(0.003) | -0.004<br>(0.003) | <b>-0.013***</b><br>(0.003) |
| LBW (<2,500 g)    | 329,011      | 11.5% | 0.00%<br>(0.08)   | -0.01%<br>(0.07) | 0.06%<br>(0.07)           | -0.05%<br>(0.07) | 0.01%<br>(0.08)   | 0.18%***<br>(0.07)          | 0.03%<br>(0.07)   | 0.18%**<br>(0.07)           |
| VLBW (<1,500 g)   | 329,011      | 3.5%  | 0.01%<br>(0.03)   | 0.03%<br>(0.04)  | 0.04%<br>(0.04)           | 0.05%<br>(0.03)  | 0.00%<br>(0.03)   | 0.07%**<br>(0.03)           | 0.04%<br>(0.04)   | 0.06%<br>(0.03)             |
| Preterm (<37 wks) | 280,509      | 15.4% | -0.03%<br>(0.10)  | 0.09%<br>(0.10)  | <b>0.35%***</b><br>(0.10) | 0.05%<br>(0.10)  | 0.03%<br>(0.10)   | 0.17%<br>(0.10)             | 0.05%<br>(0.10)   | 0.10%<br>(0.10)             |
| Male              | 336,317      | 50.5% | 0.05%<br>(4.24)   | -0.01%<br>(4.24) | -0.13%<br>(4.24)          | 0.03%<br>(4.20)  | -0.04%<br>(4.19)  | -0.17%<br>(4.18)            | -0.10%<br>(4.18)  | -0.12%<br>(4.17)            |

**Notes:**

Data obtained from National Center of Health Statistics 1995 to 2002 birth certificates. Data was collapsed such that each cell contains all the individuals from the same county of residence, month of birth, year of birth, and sex. The regressions are weighted by the number of individuals that are contained in each cell.

Robust standard errors are in parenthesis with, \*\*, meaning significant at 5 percent, \*\*\*, meaning significant at 1 percent, and **BOX** meaning significant using the Schwarz Criteria.

Each regression controls for 16 month birth cohort fixed effects, birth month fixed effects, mother's state of residence fixed effects, fixed effects for live birth order (8-levels), fixed effects for mother's age (36-levels), fixed effects for mother's education level (18-levels), plurality, mother's diabetes, mother's race (white, black, Hispanic, and other), child's gender, and an interaction of the birth cohort and mother's state of residence fixed effects.

<sup>1</sup>The Washington D.C. metropolitan area is defined as the Washington, DC-MD-VA-WV Primary Metropolitan Statistical Area (PMSA)



**Table B4**  
**Departure of Birth Outcomes for Children In Utero During 9/11 Attack**  
**Using Collapsed Natality Data on Births from January 1, 1995 to May 31, 2002**  
**Excluding Residents of New York City and the Washington D.C. Metropolitan Area<sup>1</sup>**  
**and Controlling for County Level Economic Conditions**

| Birth Outcome     | Observations | Mean  | Month of Birth    |                  |                            |                  |                   |                              |                       |                              |
|-------------------|--------------|-------|-------------------|------------------|----------------------------|------------------|-------------------|------------------------------|-----------------------|------------------------------|
|                   |              |       | Oct 2001          | Nov 2001         | Dec 2001                   | Jan 2002         | Feb 2002          | Mar 2002                     | Apr 2002              | May 2002                     |
| Birthweight       | 329,011      | 3,218 | -0.13<br>(2.06)   | 0.46<br>(1.95)   | -4.83 **<br>(1.97)         | 1.56<br>(1.94)   | -1.85<br>(1.97)   | <b>-9.02 ***</b><br>(1.95)   | -5.31 ***<br>(2.00)   | <b>-10.36 ***</b><br>(1.91)  |
| BW for GA Z-Score | 280,177      | -0.06 | -0.004<br>(0.003) | 0.000<br>(0.003) | -0.002<br>(0.003)          | 0.003<br>(0.003) | -0.005<br>(0.003) | <b>-0.012 ***</b><br>(0.003) | -0.009 ***<br>(0.003) | <b>-0.017 ***</b><br>(0.003) |
| LBW (<2,500 g)    | 329,011      | 11.5% | 0.01%<br>(0.08)   | -0.02%<br>(0.08) | 0.08%<br>(0.08)            | -0.02%<br>(0.07) | 0.05%<br>(0.08)   | 0.21% ***<br>(0.07)          | 0.08%<br>(0.07)       | 0.23% ***<br>(0.07)          |
| VLBW (<1,500 g)   | 329,011      | 3.5%  | 0.01%<br>(0.04)   | 0.03%<br>(0.04)  | 0.05%<br>(0.04)            | 0.06%<br>(0.03)  | 0.01%<br>(0.03)   | 0.07% **<br>(0.04)           | 0.04%<br>(0.04)       | 0.07%<br>(0.03)              |
| Preterm (<37 wks) | 280,509      | 15.4% | -0.04%<br>(0.10)  | 0.06%<br>(0.10)  | <b>0.38% ***</b><br>(0.10) | 0.06%<br>(0.10)  | 0.06%<br>(0.10)   | 0.20% **<br>(0.10)           | 0.09%<br>(0.10)       | 0.14%<br>(0.10)              |
| Male              | 336,317      | 50.5% | 0.01%<br>(4.28)   | -0.05%<br>(4.27) | -0.15%<br>(4.28)           | -0.02%<br>(4.23) | -0.05%<br>(4.23)  | -0.25%<br>(4.23)             | -0.15%<br>(4.24)      | -0.19%<br>(4.21)             |

**Notes:**

Data obtained from National Center of Health Statistics 1995 to 2002 birth certificates. Data was collapsed such that each cell contains all the individuals from the same county of residence, month of birth, year of birth, and sex. The regressions are weighted by the number of individuals that are contained in each cell.

Robust standard errors are in parenthesis with, \*\*, meaning significant at 5 percent, \*\*\*, meaning significant at 1 percent, and **BOX** meaning significant using the Schwarz Criteria.

Each regression controls for 16 month birth cohort fixed effects, birth month fixed effects, mother's state of residence fixed effects, fixed effects for live birth order (8-levels), fixed effects for mother's age (36-levels), fixed effects for mother's education level (18-levels), plurality, mother's diabetes, mother's race (white, black, Hispanic, and other), child's gender, and an interaction of the birth cohort and mother's state of residence fixed effects. Additionally, these regressions contain controls for the unemployment level in the child's county of residence during the 15 months following the estimated conception month, calculated from the Bureau of Labor Statistics, Local Area Unemployment Statistics.

<sup>1</sup>The Washington D.C. metropolitan area is defined as the Washington, DC-MD-VA-WV Primary Metropolitan Statistical Area (PMSA)

**Table B5**  
**Departure of Birth Outcomes for Children In Utero During 9/11 Attack**  
**Using Collapsed Natality Data on Births from January 1, 1995 to May 31, 2002**  
**Excluding Residents of New York City and the Washington D.C. Metropolitan Area<sup>1</sup>**  
**and Including County Level Fixed Effects**

| Birth Outcome     | Observations | Mean  | Month of Birth    |                  |                            |                  |                   |                            |                   |                              |
|-------------------|--------------|-------|-------------------|------------------|----------------------------|------------------|-------------------|----------------------------|-------------------|------------------------------|
|                   |              |       | Oct 2001          | Nov 2001         | Dec 2001                   | Jan 2002         | Feb 2002          | Mar 2002                   | Apr 2002          | May 2002                     |
| Birthweight       | 329,011      | 3,218 | -0.27<br>(1.68)   | 0.45<br>(1.60)   | -3.79 **<br>(1.60)         | 2.47<br>(1.63)   | -0.28<br>(1.67)   | <b>-7.47 ***</b><br>(1.62) | -3.01<br>(1.67)   | <b>-8.13 ***</b><br>(1.65)   |
| BW for GA Z-Score | 280,177      | -0.06 | -0.004<br>(0.003) | 0.001<br>(0.003) | 0.000<br>(0.003)           | 0.005<br>(0.003) | -0.002<br>(0.003) | -0.009 ***<br>(0.003)      | -0.005<br>(0.003) | <b>-0.013 ***</b><br>(0.003) |
| LBW (<2,500 g)    | 329,011      | 11.5% | 0.01%<br>(0.07)   | -0.01%<br>(0.07) | 0.06%<br>(0.07)            | -0.04%<br>(0.07) | 0.02%<br>(0.07)   | 0.19% ***<br>(0.07)        | 0.04%<br>(0.07)   | 0.18% ***<br>(0.07)          |
| VLBW (<1,500 g)   | 329,011      | 3.5%  | 0.01%<br>(0.03)   | 0.03%<br>(0.04)  | 0.04%<br>(0.04)            | 0.05%<br>(0.03)  | 0.00%<br>(0.03)   | 0.07% **<br>(0.03)         | 0.04%<br>(0.04)   | 0.06%<br>(0.03)              |
| Preterm (<37 wks) | 280,509      | 15.4% | -0.01%<br>(0.09)  | 0.10%<br>(0.09)  | <b>0.36% ***</b><br>(0.09) | 0.06%<br>(0.09)  | 0.04%<br>(0.10)   | 0.17%<br>(0.09)            | 0.05%<br>(0.09)   | 0.09%<br>(0.09)              |
| Male              | 336,317      | 50.5% | -0.01%<br>(4.25)  | -0.04%<br>(4.25) | -0.11%<br>(4.25)           | -0.03%<br>(4.21) | -0.09%<br>(4.20)  | -0.21%<br>(4.19)           | -0.17%<br>(4.19)  | -0.13%<br>(4.18)             |

**Notes:**

Data obtained from National Center of Health Statistics 1995 to 2002 birth certificates. Data was collapsed such that each cell contains all the individuals from the same county of residence, month of birth, year of birth, and sex. The regressions are weighted by the number of individuals that are contained in each cell.

Robust standard errors are in parenthesis with, \*\*, meaning significant at 5 percent, \*\*\*, meaning significant at 1 percent, and **BOX** meaning significant using the Schwarz Criteria.

Each regression controls for 16 month birth cohort fixed effects, birth month fixed effects, mother's county of residence fixed effects, fixed effects for live birth order (8-levels), fixed effects for mother's age (36-levels), fixed effects for mother's education level (18-levels), plurality, mother's diabetes, mother's race (white, black, Hispanic, and other), child's gender, and an interaction of the birth cohort and mother's county of residence fixed effects.

<sup>1</sup>Washington D.C. metropolitan area defined as the Washington Metropolitan Statistical Area (MSA).

**Table C1**  
**Summary Statistics**  
**Using Natality Data on Births Conceived in 1995**  
**Excluding Residents of New York City and the Washington D.C. Metropolitan Area<sup>1</sup>**

|                                           | Observations | Mean    | Std. Dev. |
|-------------------------------------------|--------------|---------|-----------|
| <i><u>Birth Outcomes</u></i>              |              |         |           |
| Birthweight                               | 3,649,309    | 3,328.6 | 603.8     |
| BW for GA Z-Score                         | 3,649,309    | 0.00    | 1.00      |
| LBW (<2,500 g)                            | 3,649,309    | 7.3%    | 26.0%     |
| VLBW (<1,500 g)                           | 3,649,309    | 1.3%    | 11.5%     |
| Preterm (<37 wks)                         | 3,651,841    | 11.0%   | 31.3%     |
| <i><u>Birth Characteristics</u></i>       |              |         |           |
| Male                                      | 3,651,841    | 51.1%   | 50.0%     |
| Plural                                    | 3,651,841    | 2.7%    | 16.2%     |
| Live Birth Order                          | 3,634,425    | 2.0     | 1.2       |
| <i><u>Maternal Characteristics</u></i>    |              |         |           |
| Mother is Non-Hispanic White              | 3,651,841    | 62.3%   | 48.5%     |
| Mother is Black                           | 3,651,841    | 14.1%   | 34.8%     |
| Mother is Hispanic                        | 3,651,841    | 18.8%   | 39.0%     |
| Mother had Gestational Diabetes           | 3,605,246    | 2.6%    | 15.8%     |
| Mother is Married                         | 3,651,841    | 68.4%   | 46.5%     |
| Mother's Age                              | 3,651,841    | 26.9    | 6.1       |
| Mother's Years of Education               | 3,605,820    | 12.7    | 2.8       |
| <i><u>Mother's Pregnancy Behavior</u></i> |              |         |           |
| Late/No Prenatal Care <sup>2</sup>        | 3,585,509    | 3.9%    | 19.3%     |
| Maternal Weight Gain                      | 2,886,003    | 30.6    | 13.0      |
| Smoking While Pregnant                    | 2,877,443    | 14.2%   | 34.9%     |
| Alcohol Use While Pregnant                | 3,080,884    | 1.5%    | 12.0%     |

**Notes:**

Data obtained from National Center of Health Statistics 1995 to 2002 birth certificates.

<sup>1</sup>The Washington D.C. metropolitan area is defined as the Washington, DC-MD-VA-WV Primary Metropolitan Statistical Area (PMSA).

<sup>3</sup>Late/No prenatal care defined as either starting prenatal care in the 3rd trimester or never receiving prenatal care.

**Table C2**  
**Summary Statistics**  
**Using Natality Data on Births Conceived in 1996**  
**Excluding Residents of New York City and the Washington D.C. Metropolitan Area<sup>1</sup>**

|                                           | Observations | Mean    | Std. Dev. |
|-------------------------------------------|--------------|---------|-----------|
| <i><u>Birth Outcomes</u></i>              |              |         |           |
| Birthweight                               | 3,642,373    | 3,324.2 | 605.1     |
| BW for GA Z-Score                         | 3,642,373    | 0.00    | 1.00      |
| LBW (<2,500 g)                            | 3,642,373    | 7.4%    | 26.2%     |
| VLBW (<1,500 g)                           | 3,642,373    | 1.4%    | 11.6%     |
| Preterm (<37 wks)                         | 3,644,618    | 11.2%   | 31.5%     |
| <i><u>Birth Characteristics</u></i>       |              |         |           |
| Male                                      | 3,644,618    | 51.1%   | 50.0%     |
| Plural                                    | 3,644,618    | 2.8%    | 16.5%     |
| Live Birth Order                          | 3,628,759    | 2.0     | 1.2       |
| <i><u>Maternal Characteristics</u></i>    |              |         |           |
| Mother is Non-Hispanic White              | 3,644,618    | 61.7%   | 48.6%     |
| Mother is Black                           | 3,644,618    | 14.3%   | 35.0%     |
| Mother is Hispanic                        | 3,644,618    | 19.2%   | 39.4%     |
| Mother had Gestational Diabetes           | 3,602,681    | 2.6%    | 15.9%     |
| Mother is Married                         | 3,644,618    | 68.2%   | 46.6%     |
| Mother's Age                              | 3,644,618    | 26.9    | 6.2       |
| Mother's Years of Education               | 3,598,164    | 12.7    | 2.8       |
| <i><u>Mother's Pregnancy Behavior</u></i> |              |         |           |
| Late/No Prenatal Care <sup>2</sup>        | 3,578,981    | 3.8%    | 19.0%     |
| Maternal Weight Gain                      | 2,896,267    | 30.7    | 13.1      |
| Smoking While Pregnant                    | 2,888,771    | 13.7%   | 34.4%     |
| Alcohol Use While Pregnant                | 3,091,965    | 1.2%    | 11.1%     |

**Notes:**

Data obtained from National Center of Health Statistics 1995 to 2002 birth certificates.

<sup>1</sup>The Washington D.C. metropolitan area is defined as the Washington, DC-MD-VA-WV Primary Metropolitan Statistical Area (PMSA).

<sup>3</sup>Late/No prenatal care defined as either starting prenatal care in the 3rd trimester or never receiving prenatal care.

**Table C3**  
**Summary Statistics**  
**Using Natality Data on Births Conceived in 1997**  
**Excluding Residents of New York City and the Washington D.C. Metropolitan Area<sup>1</sup>**

|                                           | Observations | Mean    | Std. Dev. |
|-------------------------------------------|--------------|---------|-----------|
| <i><u>Birth Outcomes</u></i>              |              |         |           |
| Birthweight                               | 3,693,318    | 3,322.1 | 607.1     |
| BW for GA Z-Score                         | 3,693,318    | 0.01    | 1.00      |
| LBW (<2,500 g)                            | 3,693,318    | 7.5%    | 26.3%     |
| VLBW (<1,500 g)                           | 3,693,318    | 1.4%    | 11.8%     |
| Preterm (<37 wks)                         | 3,695,823    | 11.5%   | 31.9%     |
| <i><u>Birth Characteristics</u></i>       |              |         |           |
| Male                                      | 3,695,823    | 51.2%   | 50.0%     |
| Plural                                    | 3,695,823    | 2.9%    | 16.9%     |
| Live Birth Order                          | 3,673,843    | 2.0     | 1.2       |
| <i><u>Maternal Characteristics</u></i>    |              |         |           |
| Mother is Non-Hispanic White              | 3,695,823    | 61.5%   | 48.7%     |
| Mother is Black                           | 3,695,823    | 14.4%   | 35.1%     |
| Mother is Hispanic                        | 3,695,823    | 19.2%   | 39.4%     |
| Mother had Gestational Diabetes           | 3,646,827    | 2.6%    | 15.9%     |
| Mother is Married                         | 3,695,823    | 67.7%   | 46.8%     |
| Mother's Age                              | 3,695,823    | 27.0    | 6.2       |
| Mother's Years of Education               | 3,644,091    | 12.8    | 2.7       |
| <i><u>Mother's Pregnancy Behavior</u></i> |              |         |           |
| Late/No Prenatal Care <sup>2</sup>        | 3,624,001    | 3.8%    | 19.1%     |
| Maternal Weight Gain                      | 2,950,503    | 30.8    | 13.3      |
| Smoking While Pregnant                    | 2,941,712    | 13.5%   | 34.2%     |
| Alcohol Use While Pregnant                | 3,146,314    | 1.1%    | 10.6%     |

**Notes:**

Data obtained from National Center of Health Statistics 1995 to 2002 birth certificates.

<sup>1</sup>The Washington D.C. metropolitan area is defined as the Washington, DC-MD-VA-WV Primary Metropolitan Statistical Area (PMSA).

<sup>3</sup>Late/No prenatal care defined as either starting prenatal care in the 3rd trimester or never receiving prenatal care.

**Table C4**  
**Summary Statistics**  
**Using Natality Data on Births Conceived in 1998**  
**Excluding Residents of New York City and the Washington D.C. Metropolitan Area<sup>1</sup>**

|                                           | Observations | Mean    | Std. Dev. |
|-------------------------------------------|--------------|---------|-----------|
| <i><u>Birth Outcomes</u></i>              |              |         |           |
| Birthweight                               | 3,721,401    | 3,320.0 | 607.5     |
| BW for GA Z-Score                         | 3,721,401    | 0.01    | 1.00      |
| LBW (<2,500 g)                            | 3,721,401    | 7.5%    | 26.4%     |
| VLBW (<1,500 g)                           | 3,721,401    | 1.4%    | 11.8%     |
| Preterm (<37 wks)                         | 3,723,612    | 11.7%   | 32.1%     |
| <i><u>Birth Characteristics</u></i>       |              |         |           |
| Male                                      | 3,723,612    | 51.2%   | 50.0%     |
| Plural                                    | 3,723,612    | 3.0%    | 17.2%     |
| Live Birth Order                          | 3,706,132    | 2.0     | 1.2       |
| <i><u>Maternal Characteristics</u></i>    |              |         |           |
| Mother is Non-Hispanic White              | 3,723,612    | 60.9%   | 48.8%     |
| Mother is Black                           | 3,723,612    | 14.2%   | 35.0%     |
| Mother is Hispanic                        | 3,723,612    | 19.8%   | 39.8%     |
| Mother had Gestational Diabetes           | 3,665,486    | 2.7%    | 16.2%     |
| Mother is Married                         | 3,723,612    | 67.4%   | 46.9%     |
| Mother's Age                              | 3,723,612    | 27.0    | 6.2       |
| Mother's Years of Education               | 3,668,687    | 12.8    | 2.7       |
| <i><u>Mother's Pregnancy Behavior</u></i> |              |         |           |
| Late/No Prenatal Care <sup>2</sup>        | 3,644,792    | 3.7%    | 18.8%     |
| Maternal Weight Gain                      | 2,973,738    | 30.7    | 13.5      |
| Smoking While Pregnant                    | 3,142,480    | 13.1%   | 33.8%     |
| Alcohol Use While Pregnant                | 3,172,958    | 1.1%    | 10.2%     |

**Notes:**

Data obtained from National Center of Health Statistics 1995 to 2002 birth certificates.

<sup>1</sup>The Washington D.C. metropolitan area is defined as the Washington, DC-MD-VA-WV Primary Metropolitan Statistical Area (PMSA).

<sup>3</sup>Late/No prenatal care defined as either starting prenatal care in the 3rd trimester or never receiving prenatal care.

**Table C5**  
**Summary Statistics**  
**Using Natality Data on Births Conceived in 1999**  
**Excluding Residents of New York City and the Washington D.C. Metropolitan Area<sup>1</sup>**

|                                           | Observations | Mean    | Std. Dev. |
|-------------------------------------------|--------------|---------|-----------|
| <i><u>Birth Outcomes</u></i>              |              |         |           |
| Birthweight                               | 3,793,392    | 3,318.7 | 606.1     |
| BW for GA Z-Score                         | 3,793,392    | 0.01    | 1.00      |
| LBW (<2,500 g)                            | 3,793,392    | 7.5%    | 26.4%     |
| VLBW (<1,500 g)                           | 3,793,392    | 1.4%    | 11.8%     |
| Preterm (<37 wks)                         | 3,795,408    | 11.7%   | 32.2%     |
| <i><u>Birth Characteristics</u></i>       |              |         |           |
| Male                                      | 3,795,408    | 51.2%   | 50.0%     |
| Plural                                    | 3,795,408    | 3.1%    | 17.3%     |
| Live Birth Order                          | 3,780,747    | 2.1     | 1.2       |
| <i><u>Maternal Characteristics</u></i>    |              |         |           |
| Mother is Non-Hispanic White              | 3,795,408    | 59.8%   | 49.0%     |
| Mother is Black                           | 3,795,408    | 14.3%   | 35.0%     |
| Mother is Hispanic                        | 3,795,408    | 20.5%   | 40.4%     |
| Mother had Gestational Diabetes           | 3,741,404    | 2.8%    | 16.6%     |
| Mother is Married                         | 3,795,408    | 67.3%   | 46.9%     |
| Mother's Age                              | 3,795,408    | 27.1    | 6.2       |
| Mother's Years of Education               | 3,741,484    | 12.8    | 2.8       |
| <i><u>Mother's Pregnancy Behavior</u></i> |              |         |           |
| Late/No Prenatal Care <sup>2</sup>        | 3,713,637    | 3.7%    | 18.9%     |
| Maternal Weight Gain                      | 3,044,595    | 31.0    | 13.6      |
| Smoking While Pregnant                    | 3,258,742    | 12.8%   | 33.4%     |
| Alcohol Use While Pregnant                | 3,250,862    | 1.0%    | 9.7%      |

**Notes:**

Data obtained from National Center of Health Statistics 1995 to 2002 birth certificates.

<sup>1</sup>The Washington D.C. metropolitan area is defined as the Washington, DC-MD-VA-WV Primary Metropolitan Statistical Area (PMSA).

<sup>3</sup>Late/No prenatal care defined as either starting prenatal care in the 3rd trimester or never receiving prenatal care.

**Table C6**  
**Summary Statistics**  
**Using Natality Data on Births Conceived in 2000**  
**Excluding Residents of New York City and the Washington D.C. Metropolitan Area<sup>1</sup>**

|                                           | Observations | Mean    | Std. Dev. |
|-------------------------------------------|--------------|---------|-----------|
| <i><u>Birth Outcomes</u></i>              |              |         |           |
| Birthweight                               | 3,804,293    | 3,310.5 | 603.5     |
| BW for GA Z-Score                         | 3,804,293    | 0.00    | 0.99      |
| LBW (<2,500 g)                            | 3,804,293    | 7.6%    | 26.5%     |
| VLBW (<1,500 g)                           | 3,804,293    | 1.4%    | 11.8%     |
| Preterm (<37 wks)                         | 3,806,177    | 11.8%   | 32.3%     |
| <i><u>Birth Characteristics</u></i>       |              |         |           |
| Male                                      | 3,806,177    | 51.1%   | 50.0%     |
| Plural                                    | 3,806,177    | 3.1%    | 17.4%     |
| Live Birth Order                          | 3,793,445    | 2.1     | 1.2       |
| <i><u>Maternal Characteristics</u></i>    |              |         |           |
| Mother is Non-Hispanic White              | 3,806,177    | 59.3%   | 49.1%     |
| Mother is Black                           | 3,806,177    | 14.1%   | 34.8%     |
| Mother is Hispanic                        | 3,806,177    | 21.1%   | 40.8%     |
| Mother had Gestational Diabetes           | 3,765,549    | 3.1%    | 17.2%     |
| Mother is Married                         | 3,806,177    | 66.9%   | 47.1%     |
| Mother's Age                              | 3,806,177    | 27.2    | 6.2       |
| Mother's Years of Education               | 3,754,928    | 12.8    | 2.8       |
| <i><u>Mother's Pregnancy Behavior</u></i> |              |         |           |
| Late/No Prenatal Care <sup>2</sup>        | 3,727,157    | 3.6%    | 18.7%     |
| Maternal Weight Gain                      | 3,068,694    | 30.9    | 13.7      |
| Smoking While Pregnant                    | 3,279,170    | 12.5%   | 33.1%     |
| Alcohol Use While Pregnant                | 3,272,137    | 0.9%    | 9.4%      |

**Notes:**

Data obtained from National Center of Health Statistics 1995 to 2002 birth certificates.

<sup>1</sup>The Washington D.C. metropolitan area is defined as the Washington, DC-MD-VA-WV Primary Metropolitan Statistical Area (PMSA).

<sup>3</sup>Late/No prenatal care defined as either starting prenatal care in the 3rd trimester or never receiving prenatal care.



**Table C7**  
**Summary Statistics**  
**Using Natality Data on Births Conceived before August 14, 2001**  
**Excluding Residents of New York City and the Washington D.C. Metropolitan Area<sup>1</sup>**

|                                           | Observations | Mean    | Std. Dev. |
|-------------------------------------------|--------------|---------|-----------|
| <i><u>Birth Outcomes</u></i>              |              |         |           |
| Birthweight                               | 2,276,282    | 3,300.1 | 605.2     |
| BW for GA Z-Score                         | 2,276,282    | -0.01   | 0.99      |
| LBW (<2,500 g)                            | 2,276,282    | 7.8%    | 26.9%     |
| VLBW (<1,500 g)                           | 2,276,282    | 1.5%    | 12.0%     |
| Preterm (<37 wks)                         | 2,277,412    | 11.9%   | 32.3%     |
| <i><u>Birth Characteristics</u></i>       |              |         |           |
| Male                                      | 2,277,412    | 51.2%   | 50.0%     |
| Plural                                    | 2,277,412    | 3.3%    | 18.0%     |
| Live Birth Order                          | 2,271,668    | 2.1     | 1.2       |
| <i><u>Maternal Characteristics</u></i>    |              |         |           |
| Mother is Non-Hispanic White              | 2,277,412    | 58.8%   | 49.2%     |
| Mother is Black                           | 2,277,412    | 14.1%   | 34.8%     |
| Mother is Hispanic                        | 2,277,412    | 21.5%   | 41.1%     |
| Mother had Gestational Diabetes           | 2,260,945    | 3.2%    | 17.6%     |
| Mother is Married                         | 2,277,412    | 66.5%   | 47.2%     |
| Mother's Age                              | 2,277,412    | 27.2    | 6.2       |
| Mother's Years of Education               | 2,248,814    | 12.9    | 2.8       |
| <i><u>Mother's Pregnancy Behavior</u></i> |              |         |           |
| Late/No Prenatal Care <sup>2</sup>        | 2,237,722    | 3.6%    | 18.7%     |
| Maternal Weight Gain                      | 1,852,065    | 31.0    | 13.8      |
| Smoking While Pregnant                    | 1,970,252    | 12.3%   | 32.8%     |
| Alcohol Use While Pregnant                | 1,966,250    | 0.9%    | 9.4%      |

**Notes:**

Data obtained from National Center of Health Statistics 1995 to 2002 birth certificates.

<sup>1</sup>The Washington D.C. metropolitan area is defined as the Washington, DC-MD-VA-WV Primary Metropolitan Statistical Area (PMSA).

<sup>3</sup>Late/No prenatal care defined as either starting prenatal care in the 3rd trimester or never receiving prenatal care.
